# Supplementary material
Source: PubMed Central journal article supplement (PMC5748021)
Supplement: NIHMS918207-supplement.pdf [file NIHMS918207-supplement.pdf]

## Supplementary Materials

*Cross-sectional age trends with data points included*

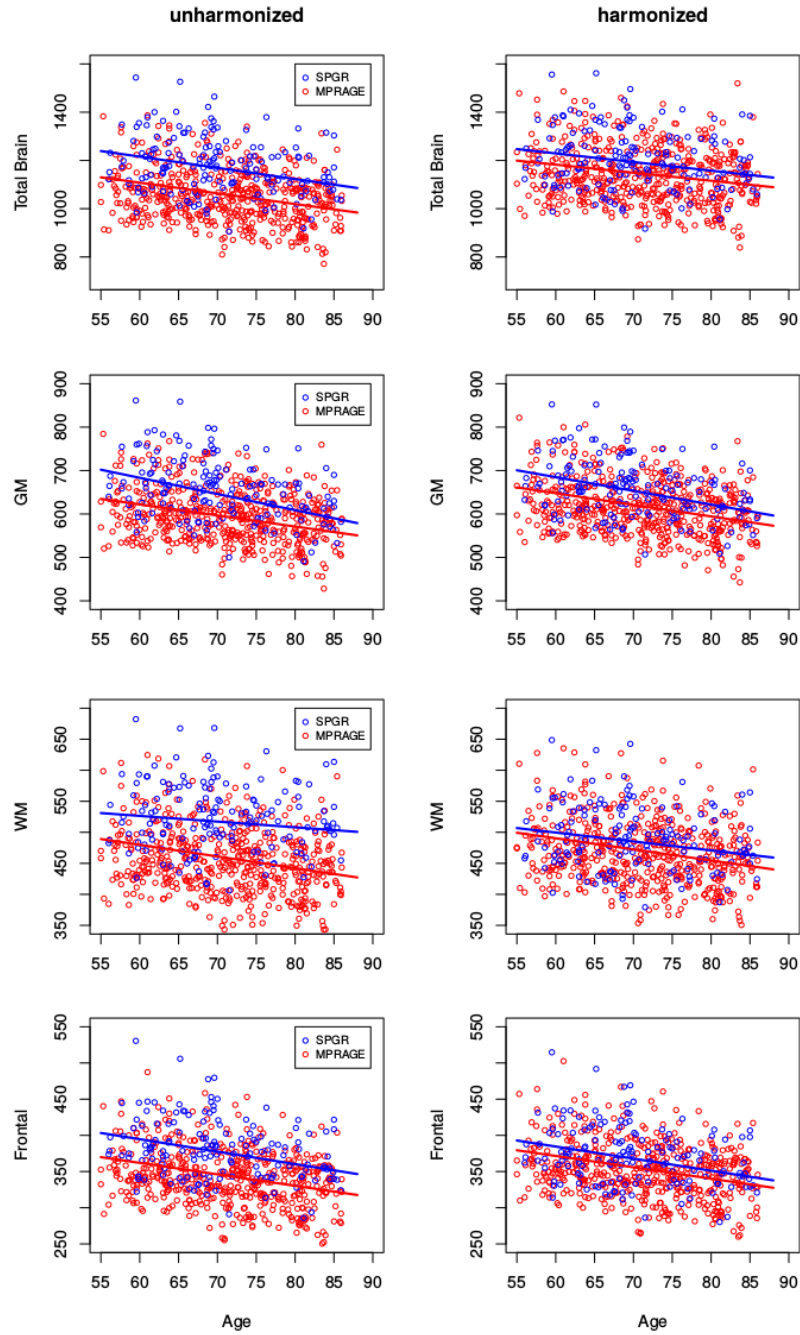

Fig.S. 1: Cross-sectional age trends for total brain, GM, WM and the frontal lobe (GM and WM together) for the two scanner types, and for harmonized and unharmonized values. The values in y axis are in cc.
